# Supplementary material for: Probing Methyl Group Tunneling in [(CH3)2NH2][Zn(HCOO)3] Hybrid Perovskite Using Co2+ EPR
Source: MDPI journal article supplement (doi:10.3390/molecules28030979), 2023-01-18
Supplement: s1 [file s1]

**Supplementary Materials**

**Probing methyl group tunneling in**

**$[(\text{CH}_3)_2\text{NH}_2][\text{Zn}(\text{HCOO})_3]$  hybrid perovskite**

**using  $\text{Co}^{2+}$  EPR**

Gediminas Usevičius, Andrea Eggeling, Ignas Pocius, Vidmantas Kalendra,  
Daniel Klose, Mirosław Mączka, Andreas Pöpl, Jūras Banys, Gunnar Jeschke,  
and Mantas Šimėnas\*

E-mail: mantas.simenas@ff.vu.lt

## Additional Raman Data

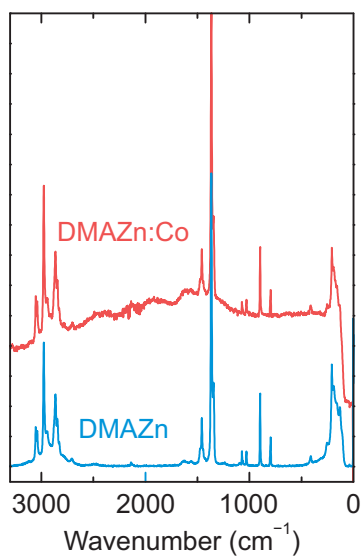

Figure S1: Raman spectra of undoped DMAZn and Co-doped DMAZn:Co obtained at room temperature.

## Additional EPR Data

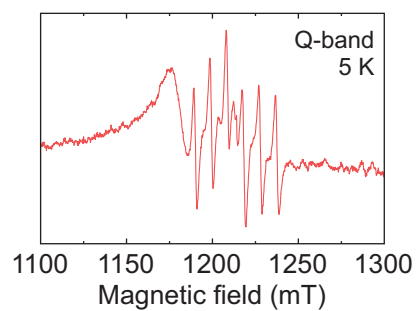

Figure S2: Q-band CW EPR spectrum of Mn<sup>2+</sup> impurities in DMAZn:Co obtained at 5 K.

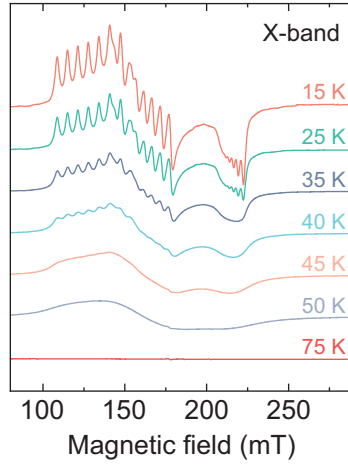

Figure S3: Temperature dependence of the X-band CW EPR spectrum of DMAZn:Co.

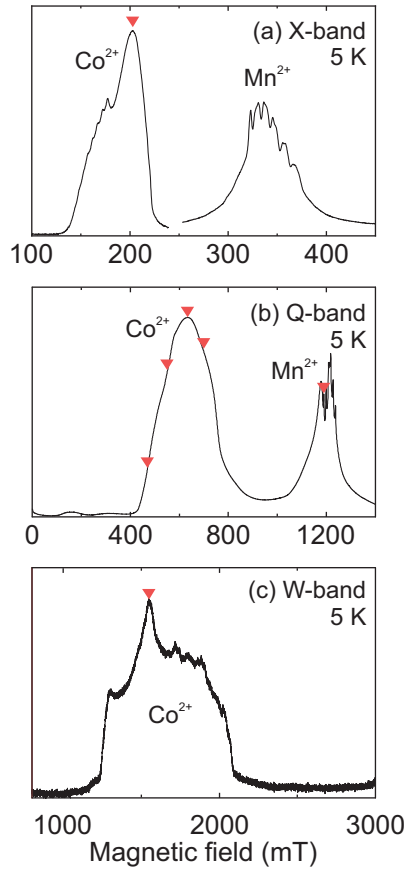

Figure S4: EDFS spectrum of DMAZn:Co obtained at 5 K and (a) X-, (b) Q-, and (c) W-band. Red triangles mark field positions, at which the 3p ESEEM experiments were performed. In addition to  $\text{Co}^{2+}$ , the X- and Q-band spectra also indicate the  $\text{Mn}^{2+}$  impurities.

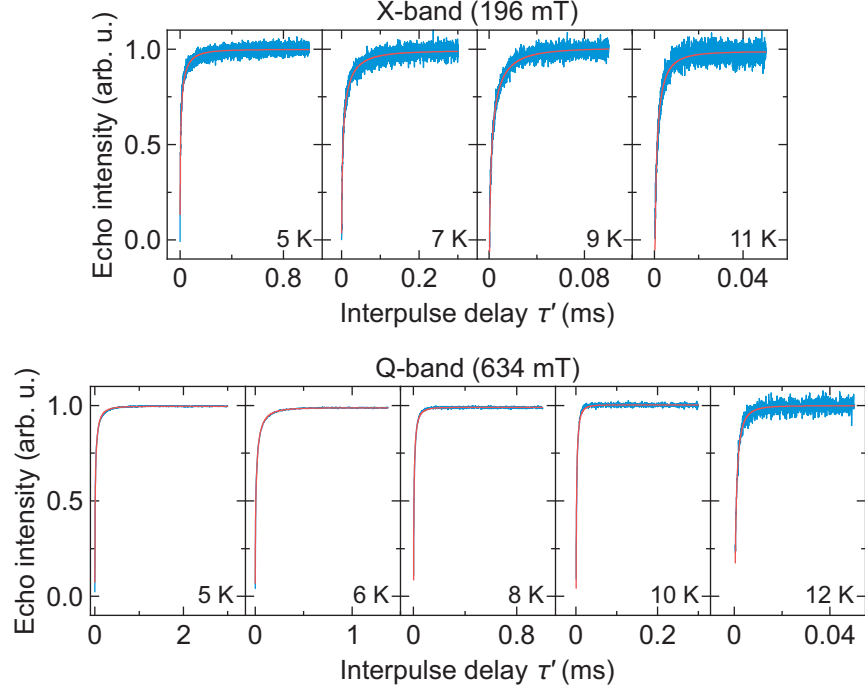

Figure S5: Inversion recovery of DMAZn:Co obtained at X- (196 mT) and Q-band (634 mT) frequencies and different temperatures. Red curves indicate the best fits to a stretched exponential recovery function:  $V = a(1 - b \exp(-\tau'/T_1)^\gamma)$ , where  $\gamma = 0.405(4)$  was obtained from a global fit of all curves.

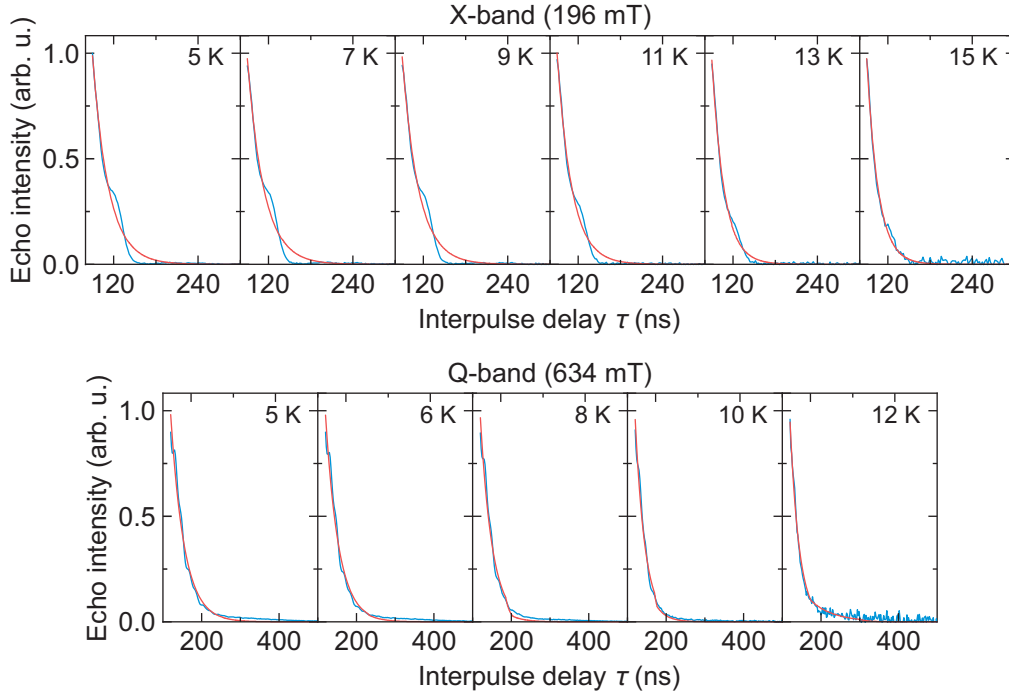

Figure S6: Hahn echo decay of DMAZn:Co obtained at X- (196 mT) and Q-band (634 mT) frequencies and different temperatures. Red curves indicate the best fits to a single exponential decay function.

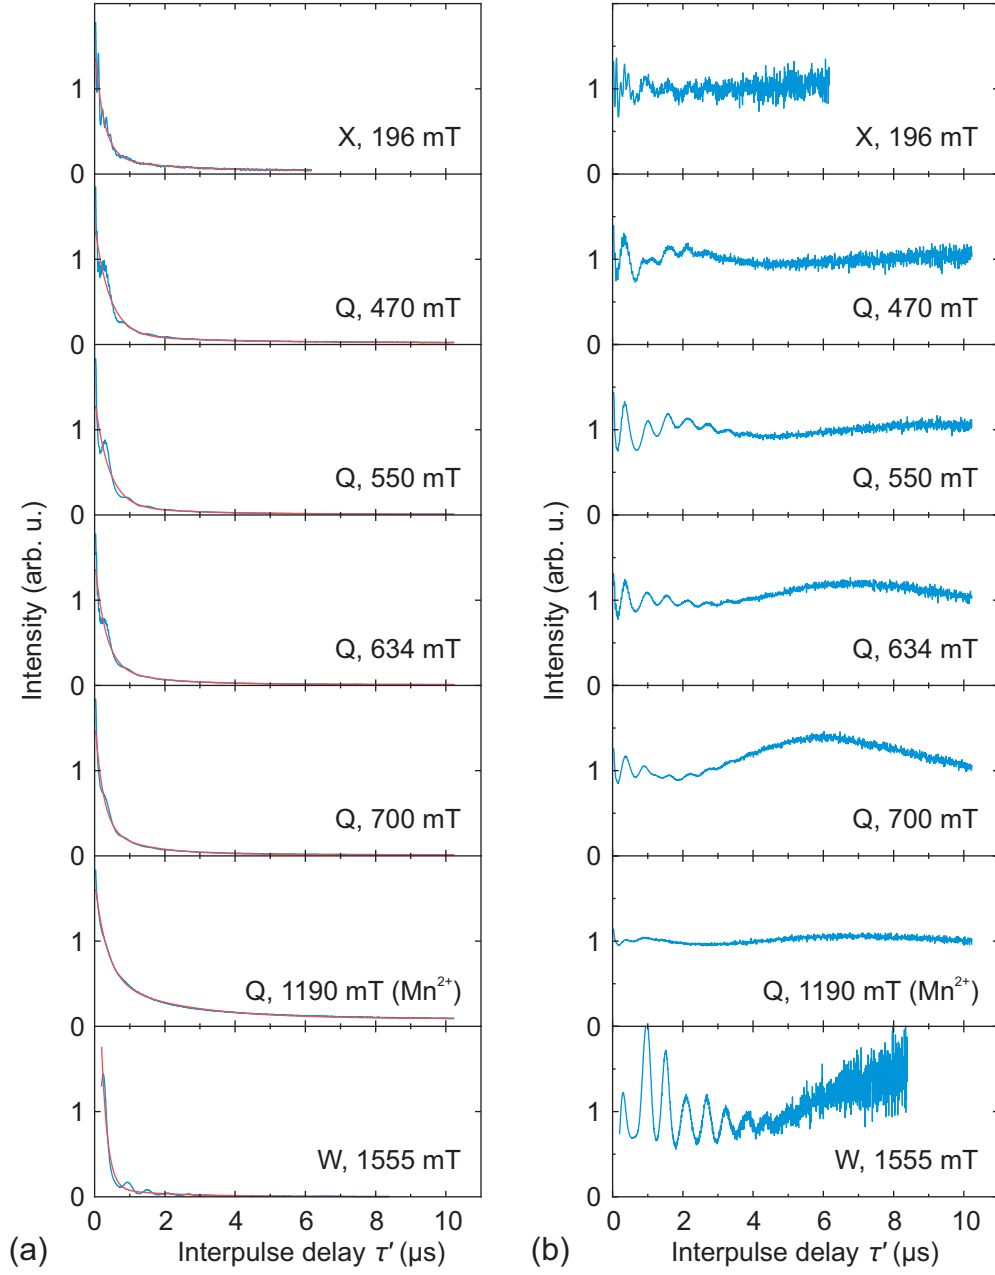

Figure S7: (a) Experimental 3p ESEEM time-domain traces of DMAZn:Co recorded at different frequency bands and magnetic fields. Red curves are the best fits to a bi-exponential decay function. (b) Time-domain traces obtained after division by the baseline function.

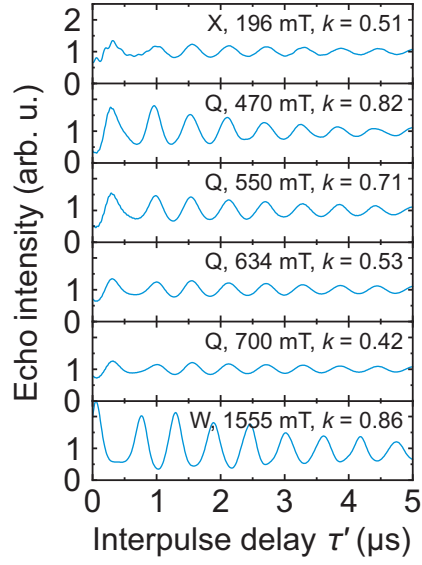

Figure S8: Simulated 3p ESEEM time-domain traces of DMAZn:Co at different microwave frequencies and magnetic fields using  $\nu_t = 1.84$  MHz and the effective  $g = 3.828$ . The modulation depth parameters  $k$  were determined from the first oscillation.

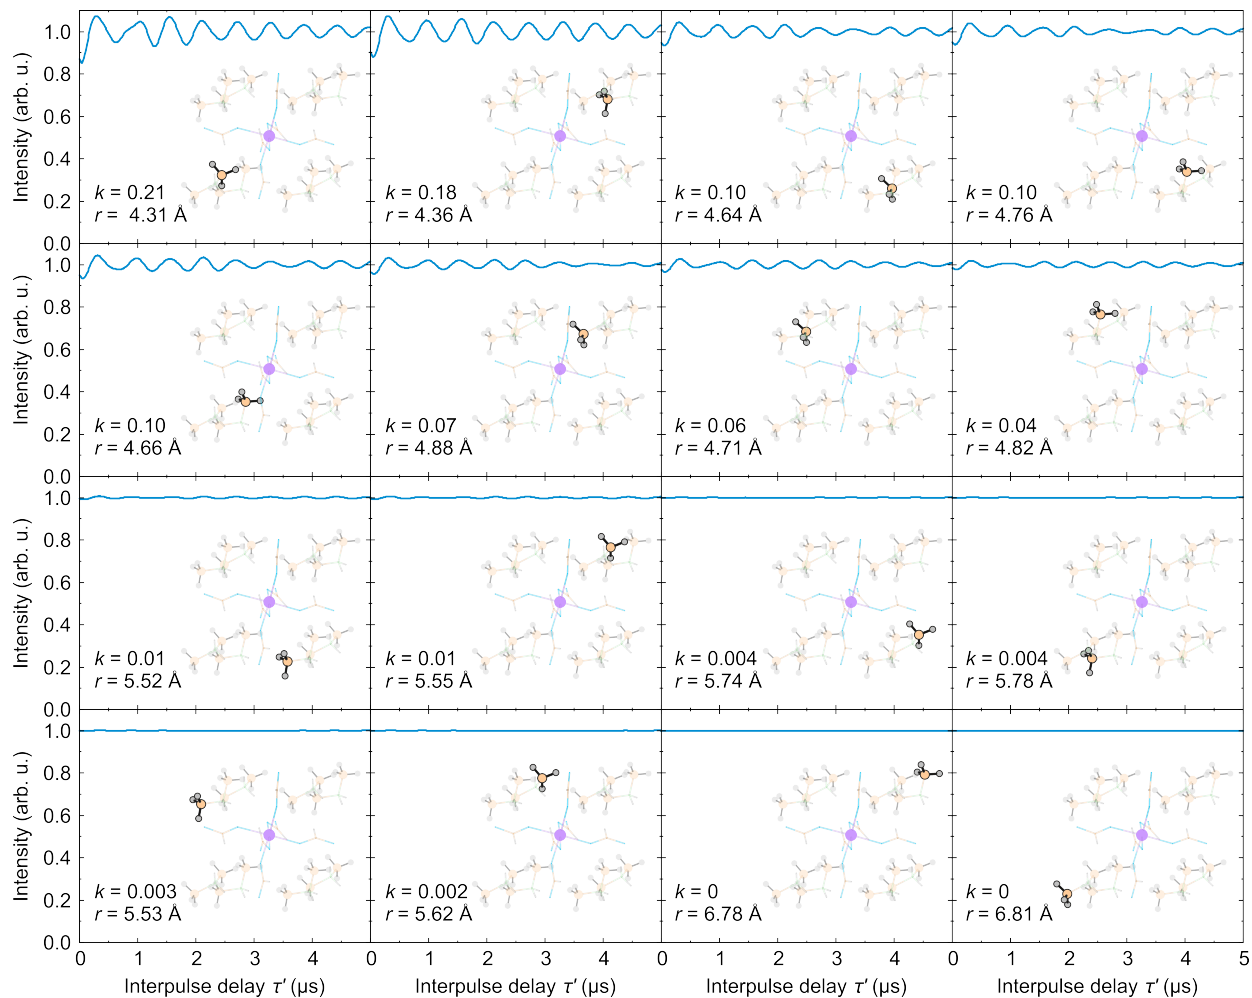

Figure S9: Simulated 3p ESEEM time-domain traces of the nearest 16 methyl groups surrounding a single  $\text{Co}^{2+}$  center in DMAZn:Co (see insets). Simulations performed at Q-band and 634 mT using  $\nu_t = 1.84$  MHz and the effective  $g = 3.828$ . The modulation depth parameters  $k$  were determined from the first oscillation. The indicated distance is between the metal center and carbon atom of a methyl group.

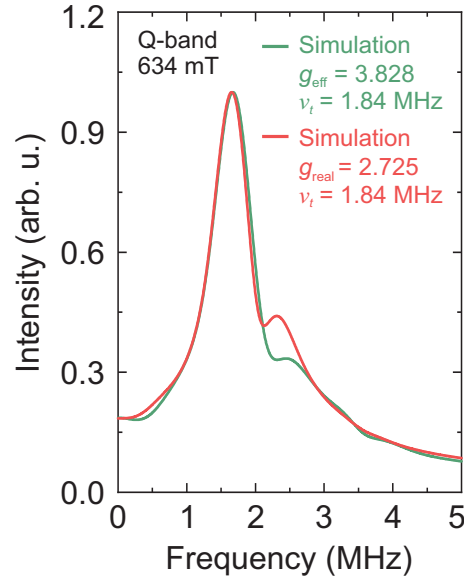

Figure S10: Simulated frequency-domain spectra of DMAZn:Co (643 mT, Q-band) obtained using the effective and real  $g$ -values of the  $\text{Co}^{2+}$  ions.

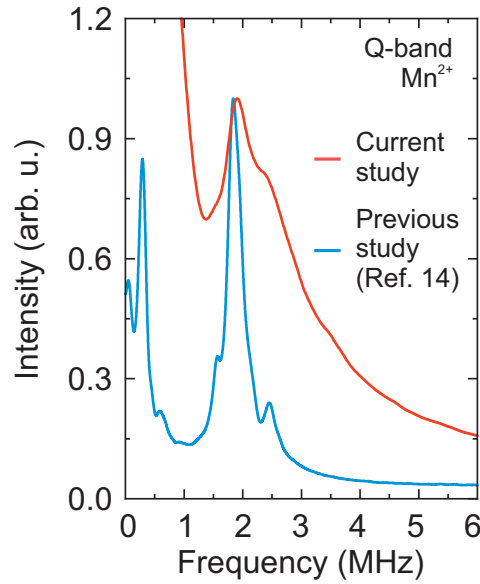

Figure S11: Comparison of the Q-band ESEEM spectrum of DMAZn obtained using the  $\text{Mn}^{2+}$  centers in our current and previous (Ref. 14) studies. A significant broadening of the ESEEM signal is observed in our current study, where we use unintentionally doped traces of  $\text{Mn}^{2+}$  to probe the methyl group tunneling.
